# Supplementary material for: Endothelial deletion of Ino80 disrupts coronary angiogenesis and causes congenital heart disease
Source: PubMed Central journal article supplement (PMC5785521; doi:10.1038/s41467-017-02796-3), 2018-01-25
Supplement: 41467_2017_2796_MOESM1_ESM.pdf [file 41467_2017_2796_MOESM1_ESM.pdf]

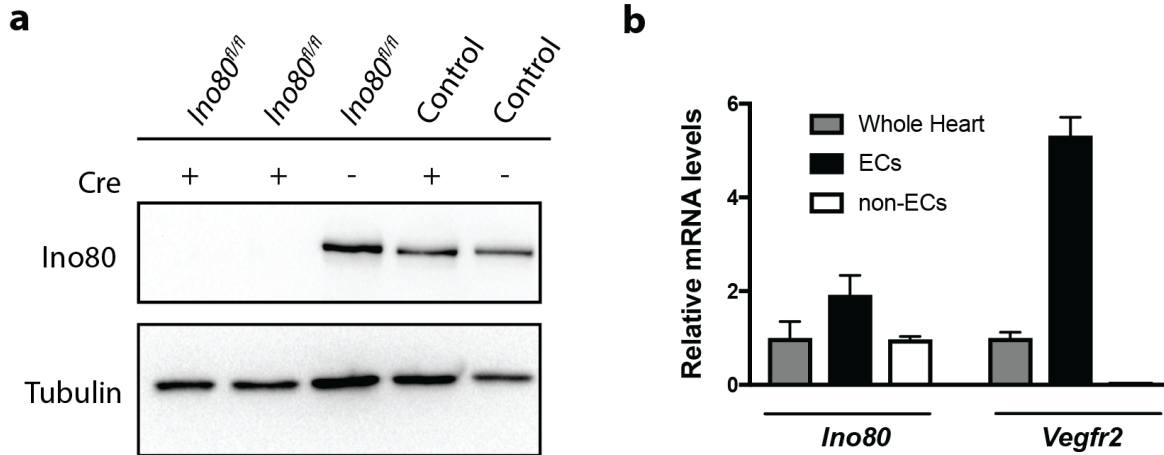

**Supplementary Figure 1. *Ino80* deletion and expression.** (a) Western blot analysis of lysates from primary mouse embryonic fibroblasts (MEFs) prepared from *Ino80 fl/fl* (n=3) and control embryos (n=2) infected with adenovirus (Cre -) or adenovirus expressing Cre recombinase (Cre +). Top panel is blot probed with anti-*Ino80* antibody. Bottom panel is blot probed within anti-tubulin antibody. (b) qPCR for *Ino80* and *Vegfr2* and in endothelial and non-endothelial cells isolated from the heart (Sorted cells, n=3 hearts; whole hearts, n=3 hearts at e14.5). Error bars in graphs are standard deviation.

| Age<br>(embryos) | Wild type                               |                                          | Het                                     | CKO                                      |
|------------------|-----------------------------------------|------------------------------------------|-----------------------------------------|------------------------------------------|
|                  | <i>Tie2Cre-<br/>Ino80 fl/+</i><br>(25%) | <i>Tie2Cre-<br/>Ino80 fl/fl</i><br>(25%) | <i>Tie2Cre+<br/>Ino80 fl/+</i><br>(25%) | <i>Tie2Cre+<br/>Ino80 fl/fl</i><br>(25%) |
| e15.5<br>(91)    | 23%                                     | 25%                                      | 25%                                     | 26%                                      |
| e16.5<br>(32)    | 34%                                     | 22%                                      | 31%                                     | 13%                                      |
| e17.5<br>(18)    | 27%                                     | 22%                                      | 28%                                     | 22%                                      |
| P1<br>(28)       | 28%                                     | 29%                                      | 35%                                     | 7%                                       |

**Supplementary Figure 2. Embryonic lethality in *Tie2Cre;Ino80 fl/fl* embryos.** Red indicates when the percentage of recovered conditional knockout (CKO) embryos was below the expected rates indicated in parentheses below genotypes.

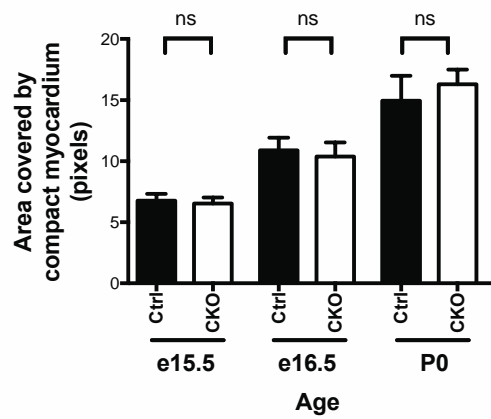

**Supplementary Figure 3. Myocardial deletion of *Ino80* does not alter compaction.** Deletion of *Ino80* in cardiomyocytes using the *Myh6Cre* deleter gene does not affect growth of the compact myocardium at indicated developmental stages. Error bars are standard deviation. (ns) Nonsignificant, evaluated by Student's *t*-test.

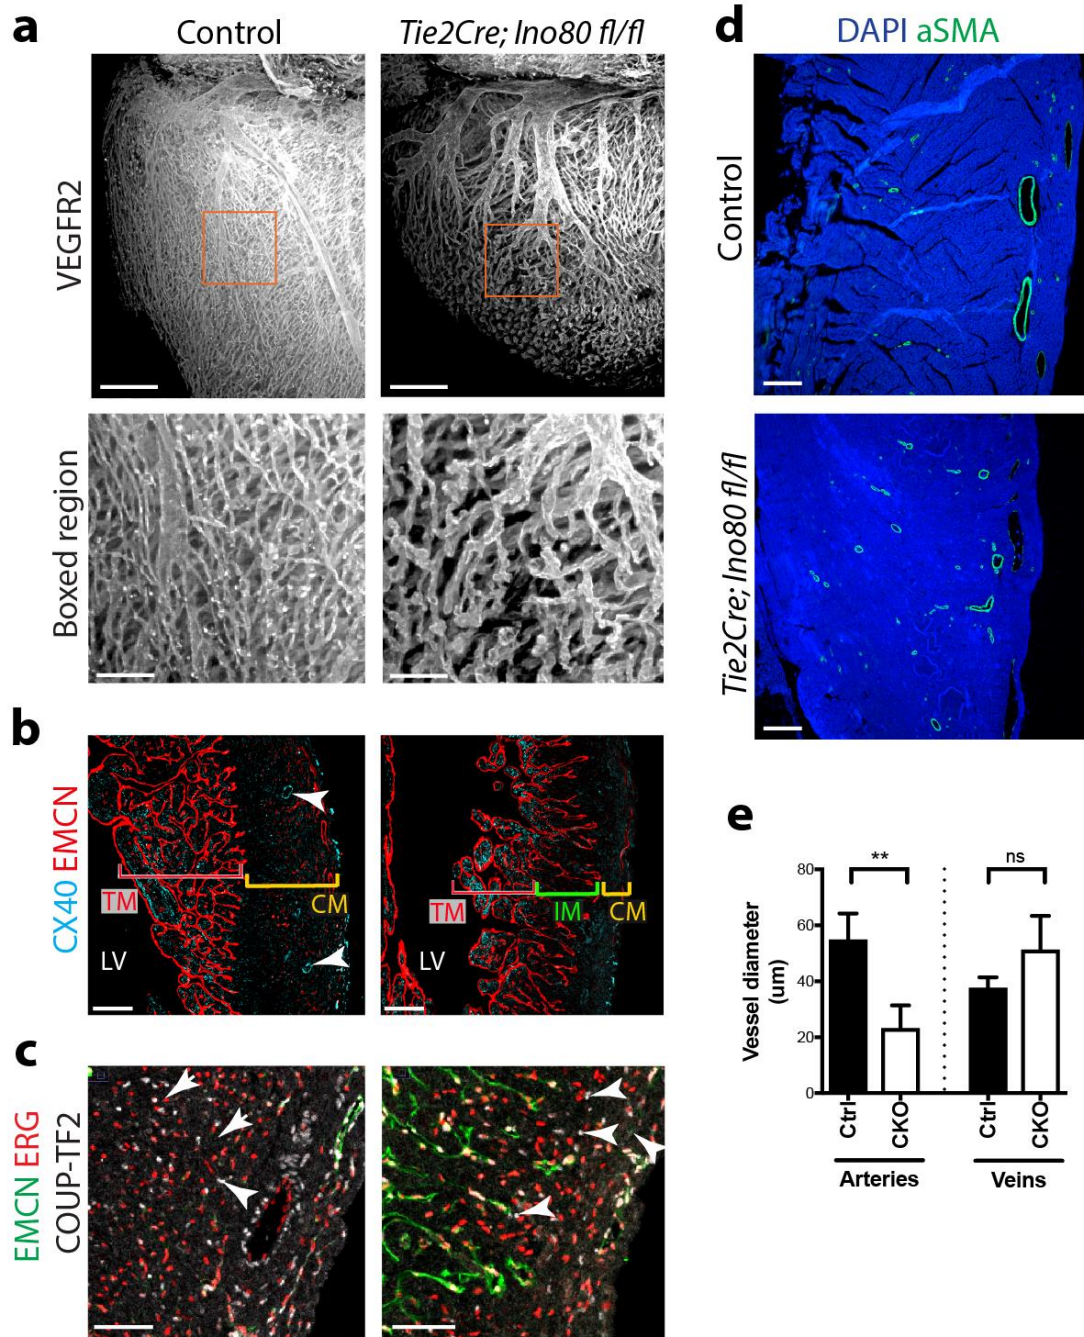

**Supplementary Figure 4. Postnatal coronary development is defective in *Ino80* mutant hearts.** (a) Whole mount confocal images of the coronary vasculature in P0. (control, n=3 hearts; mutant, n=3 hearts). Scale bars: 100 µm (low) and 25 µm (high magnification). (b) Tissue sections through P0 hearts revealed that CX40<sup>+</sup> arteries (arrowheads) are missing in mutants hearts and that the presence of the intermediate myocardium (IM) persists. (control, n=3 hearts; mutant, n=3 hearts). Scale bars: 100 µm. (c) Double labeling with pericyte (COUP-TF2) and endothelial (ERG) markers showed the presence of pericytes near coronary vessels (arrowheads) in control and mutant hearts. (control, n=3 hearts; mutant, n=3

hearts). Scale bars: 100  $\mu\text{m}$ . (**d, e**) Immunofluorescence (**d**) and quantification (**e**) of arterial smooth muscle in P22 hearts indicate that surviving mutants have small arteries. Error bars in graphs are standard deviation. (control, n=4 hearts; mutant, n=5 hearts). (ns) Nonsignificant; (\*\*)  $P < 0.01$ , evaluated by Student's *t*-test. Scale bars: 50  $\mu\text{m}$ .

*Nfatc1Cre*; *Rosa<sup>mTmG</sup>* : endocardial cells and derived vessels, non-endocardial cells

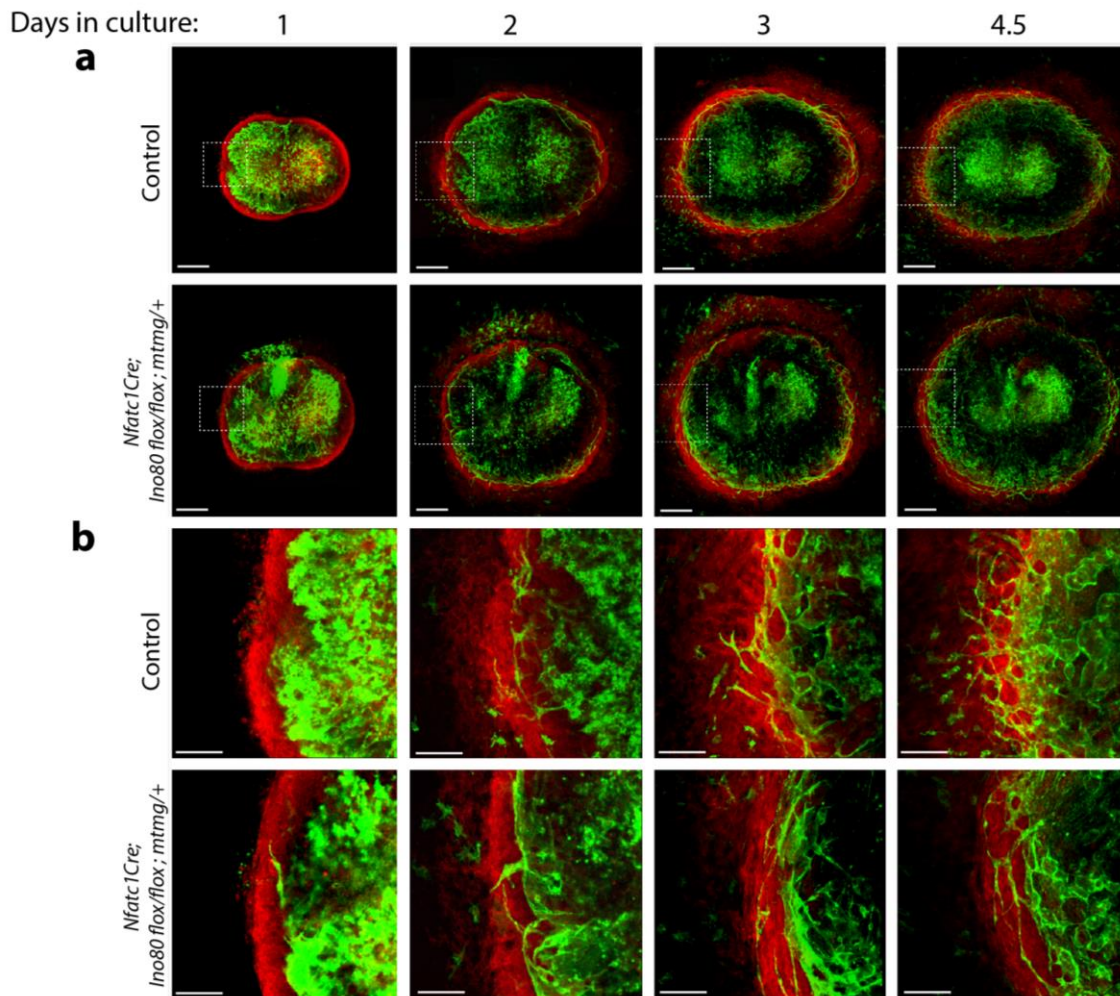

**Supplementary Figure 5. Time lapse analysis of ventricle/endocardial cell cultures.** Two representative ventricle cultures (one control and one *Nfatc1Cre*;*Ino80 flox/flox* mutant) imaged after the indicated number of days in cultures. Endocardial cells and their derivatives are labeled in green through *Nfatc1Cre*-mediated recombination of the *Rosa<sup>mTmG</sup>* reporter allele. All other cells are labeled in red. Scale bars: 100  $\mu\text{m}$  (a) and 25  $\mu\text{m}$  (b).



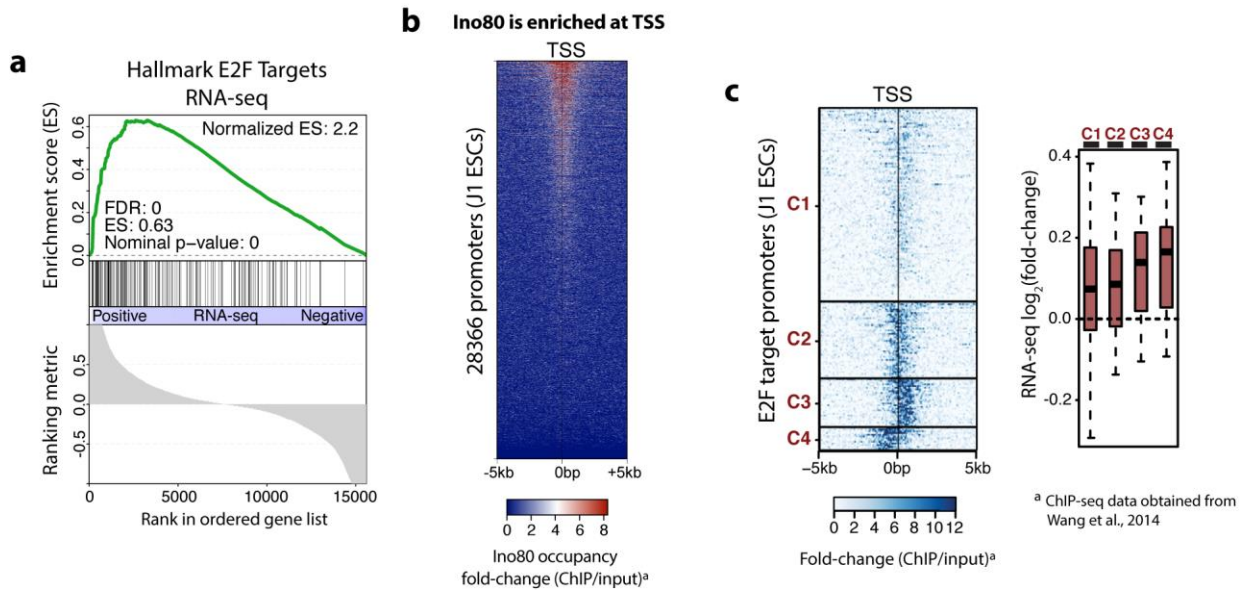

**Supplementary Figure 6. Ino80 regulates E2F-target genes.** (a) RNA-seq enrichment of hallmark E2F-target genes in *Tie2Cre;Ino80 fl/fl* hearts. False discovery rate (FDR) is adjusted p-value of enrichment. (b) Ino80 ChIP occupancy values (fold-change, IP/input) across 28,336 promoters within a 10kb window surrounding the transcription start site (TSS) of J1 embryonic stem cells (ESCs). (c) Left panel, Ino80 occupancy across individual genes are indicated by heatmap with k-means clustering. Right panel, boxplot shows RNA-seq expression trends for each of the 4 E2F-target clusters (C1-C4) in *Tie2Cre;Ino80 fl/fl* hearts. Wilcoxon rank sum p-values are <0.01 for each cluster compared to the genome-wide RNA-seq log<sub>2</sub> fold change.

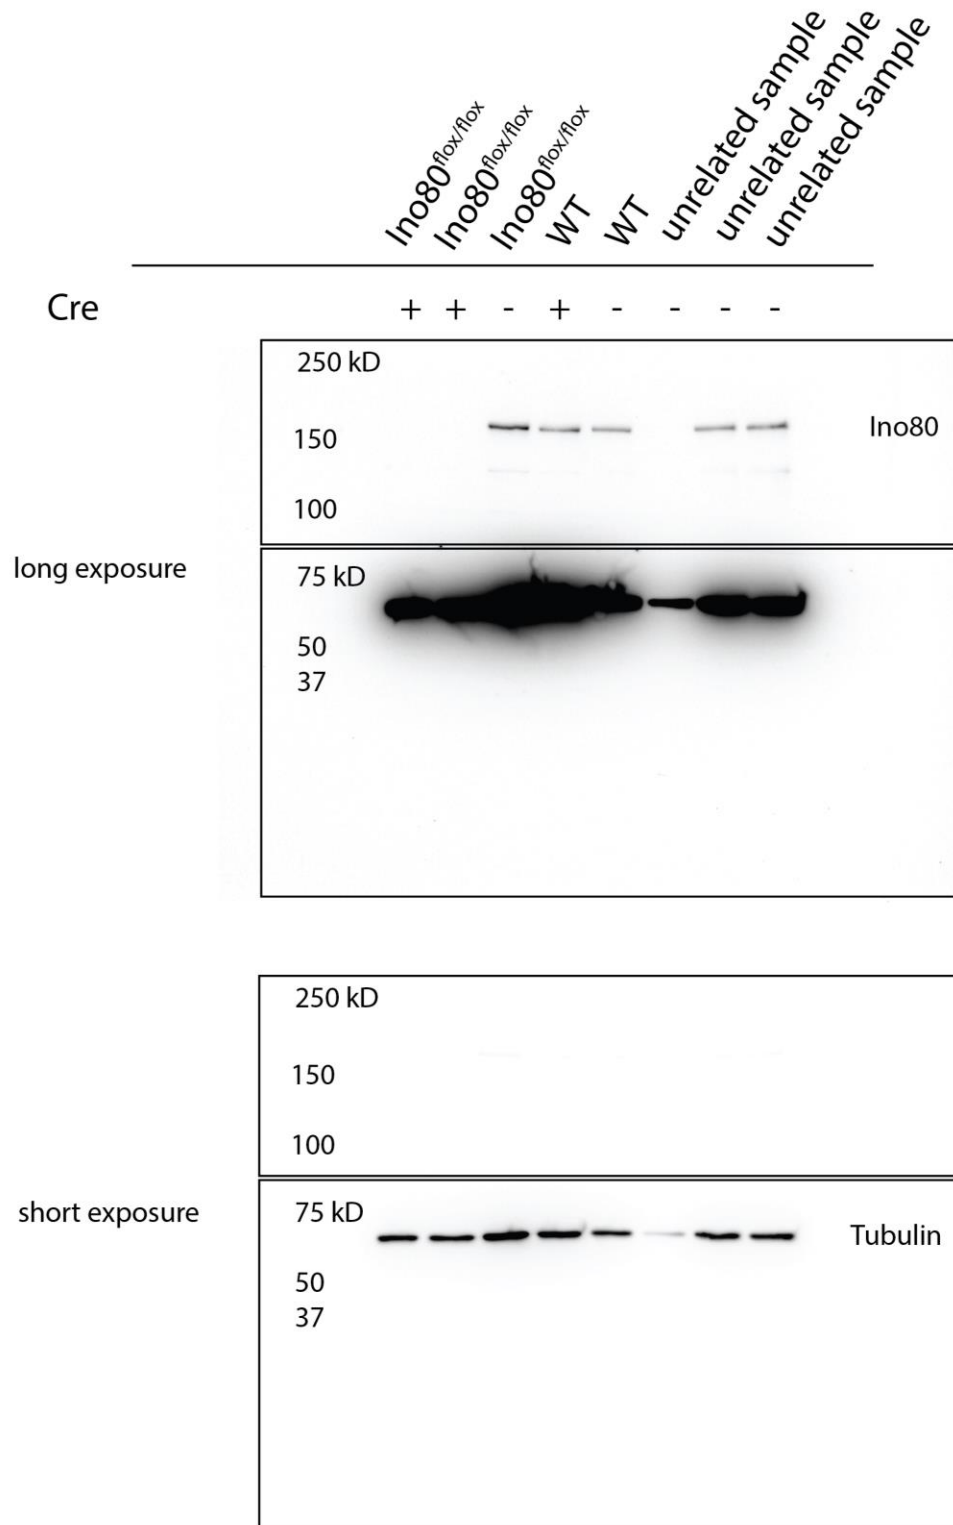

**Supplementary Figure 7.** Original immunoblot used for Supplementary Figure 1 indicated within the main manuscript.



**Supplementary Table 1. Summaries of antibodies used for Immunostaining**  
 Anybody information and working condition for immunostaining are provided in the table

| Antibody           | Manufacturer/Cat#                                        | Dilutions/ Immunostaining condition |                  |                |               |
|--------------------|----------------------------------------------------------|-------------------------------------|------------------|----------------|---------------|
|                    |                                                          | Whole mount                         | Paraffin section | Frozen section | Cell/ Explant |
| ENDOMUCIN          | Santa Cruz (sc-65495)                                    |                                     | 1:250            |                |               |
| VE-cadherin        | BD Biosciences                                           | 1:250                               |                  | 1:500          |               |
| CTNT               | Developmental Studies Hybridoma Bank (CT3-c)             | 1:1000                              | 1:1000           | 1:1000         |               |
| DACH1              | Proteintech (10914-1-AP)                                 | 1:1000                              | 1:1000           | 1:1000         |               |
| CX40               | Alpha Diagnostic Intl. Inc., (CX40-A)                    | 1:500                               | 1:1000           | 1:1000         |               |
| hPROX1             | R&D Systems (AF2727)                                     |                                     | 1:250            |                |               |
| COUP-TF2           | Perseus Proteomics (PP-H7147-00)                         |                                     | 1:1000           |                |               |
| Myomesin           | Developmental Studies Hybridoma Bank, (mMaC myomesin B4) |                                     | 1:1000           | 1:1000         |               |
| Myosin Heavy Chain | Alfa Aesar (BT 562)                                      | 1:1000                              |                  |                |               |
| NKX2.5             | Santa Cruz (sc-8697)                                     |                                     | 1:250            | 1:250          | 1:250         |
| ERG                | Abcam (ab92513)                                          | 1:1000                              | 1:1000           | 1:1000         | 1:1000        |
| VEGFR2             | R&D Systems (AF644)                                      | 1:250                               |                  | 1:250          |               |
| DAPI               | Sigma Aldrich                                            | 1:1000                              | 1:2000           | 1:2000         | 1:2000        |
