# Supplementary material for: Endothelial deletion of Ino80 disrupts coronary angiogenesis and causes congenital heart disease
Source: PubMed Central journal article supplement (PMC5785521; doi:10.1038/s41467-017-02796-3), 2018-01-25
Supplement: 41467_2017_2796_MOESM2_ESM.pdf [file 41467_2017_2796_MOESM2_ESM.pdf]

## Description of Additional Supplementary Files

### **File Name: Supplementary Movie 1**

Description: Time lapse imaging of control endothelial cells following experimental wounding. HUVEC monolayers treated with control siRNA were wounded with a scratch and imaged for 24 hours. Cells at the edge of the wound migrate to fill the available space. Movie is representative of 6 experimental repeats. Scale bar: 100  $\mu\text{m}$ .

### **File Name: Supplementary Movie 2**

Description: Time lapse imaging of *Ino80*-deficient endothelial cells following experimental wounding. HUVEC monolayers treated with *Ino80*-specific siRNA were wounded with a scratch and imaged for 24 hours. Migration of *Ino80*-depleted cells is delayed and less directional than controls while cell-cell contacts are also decreased. Movie is representative of 6 experimental repeats. Scale bar: 100  $\mu\text{m}$ .
